# Supplementary material
Source: PubMed Central journal article supplement (PMC9906346)
Supplement: mmc1-sup1-supinfo.pdf [file mmc1-sup1-supinfo.pdf]

## **Supplementary material table of contents**

Supplementary Table 1: PRISMA checklist

Supplementary Table 2: Excluded studies

Supplementary Table 3: Excluded studies

Supplementary Table 4: Risk of bias analysis

Supplementary figure 1: Outcome of COVID-19 in KTR per region.

Supplementary figure 2: Outcome of COVID-19 in KTR in females and males.

Supplementary figure 3: Outcome of COVID-19 in KTR with reported comorbidities.

Supplementary figure 4: Effect of treatment on outcome of COVID-19 in KTR.

**Supplementary table 1: PRISMA checklist**

| Section and Topic             | Item # | Checklist item                                                                                                                                                                                                                                                                                       | Location where item is reported |
|-------------------------------|--------|------------------------------------------------------------------------------------------------------------------------------------------------------------------------------------------------------------------------------------------------------------------------------------------------------|---------------------------------|
| <b>TITLE</b>                  |        |                                                                                                                                                                                                                                                                                                      |                                 |
| Title                         | 1      | Identify the report as a systematic review.                                                                                                                                                                                                                                                          | Title                           |
| <b>ABSTRACT</b>               |        |                                                                                                                                                                                                                                                                                                      |                                 |
| Abstract                      | 2      | See the PRISMA 2020 for Abstracts checklist.                                                                                                                                                                                                                                                         | Abstract                        |
| <b>INTRODUCTION</b>           |        |                                                                                                                                                                                                                                                                                                      |                                 |
| Rationale                     | 3      | Describe the rationale for the review in the context of existing knowledge.                                                                                                                                                                                                                          | Throughout introduction         |
| Objectives                    | 4      | Provide an explicit statement of the objective(s) or question(s) the review addresses.                                                                                                                                                                                                               | Introduction, last paragraph    |
| <b>METHODS</b>                |        |                                                                                                                                                                                                                                                                                                      |                                 |
| Eligibility criteria          | 5      | Specify the inclusion and exclusion criteria for the review and how studies were grouped for the syntheses.                                                                                                                                                                                          | Par. 2.2, 2.3 and 2.5           |
| Information sources           | 6      | Specify all databases, registers, websites, organisations, reference lists and other sources searched or consulted to identify studies. Specify the date when each source was last searched or consulted.                                                                                            | Par. 2.1                        |
| Search strategy               | 7      | Present the full search strategies for all databases, registers and websites, including any filters and limits used.                                                                                                                                                                                 | Par. 2.1                        |
| Selection process             | 8      | Specify the methods used to decide whether a study met the inclusion criteria of the review, including how many reviewers screened each record and each report retrieved, whether they worked independently, and if applicable, details of automation tools used in the process.                     | Par. 2.2                        |
| Data collection process       | 9      | Specify the methods used to collect data from reports, including how many reviewers collected data from each report, whether they worked independently, any processes for obtaining or confirming data from study investigators, and if applicable, details of automation tools used in the process. | Par. 2.2 and 2.3                |
| Data items                    | 10a    | List and define all outcomes for which data were sought. Specify whether all results that were compatible with each outcome domain in each study were sought (e.g. for all measures, time points, analyses), and if not, the methods used to decide which results to collect.                        | Par 2.3                         |
|                               | 10b    | List and define all other variables for which data were sought (e.g. participant and intervention characteristics, funding sources). Describe any assumptions made about any missing or unclear information.                                                                                         | Par 2.3                         |
| Study risk of bias assessment | 11     | Specify the methods used to assess risk of bias in the included studies, including details of the tool(s) used, how many reviewers assessed each study and whether they worked independently, and if applicable, details of automation tools used in the process.                                    | Par 2.4                         |
| Effect measures               | 12     | Specify for each outcome the effect measure(s) (e.g. risk ratio, mean difference) used in the synthesis or presentation of results.                                                                                                                                                                  | Par 2.5                         |
| Synthesis methods             | 13a    | Describe the processes used to decide which studies were eligible for each synthesis (e.g. tabulating the study intervention characteristics and comparing against the planned groups for each synthesis (item #5)).                                                                                 | Par 2.5                         |
|                               | 13b    | Describe any methods required to prepare the data for presentation or synthesis, such as handling of missing summary statistics, or data conversions.                                                                                                                                                | Par 2.5, Suppl table 2          |
|                               | 13c    | Describe any methods used to tabulate or visually display results of individual studies and syntheses.                                                                                                                                                                                               | Par 2.5, Suppl table 3          |
|                               | 13d    | Describe any methods used to synthesize results and provide a rationale for the choice(s). If meta-analysis was performed, describe the model(s), method(s) to identify the presence and extent of statistical heterogeneity, and software package(s) used.                                          | Par 2.5                         |
|                               | 13e    | Describe any methods used to explore possible causes of heterogeneity among study results (e.g. subgroup analysis, meta-regression).                                                                                                                                                                 | Par 2.5                         |
|                               | 13f    | Describe any sensitivity analyses conducted to assess robustness of the synthesized results.                                                                                                                                                                                                         | Par 2.6                         |

| Section and Topic             | Item # | Checklist item                                                                                                                                                                                                                                                                       | Location where item is reported   |
|-------------------------------|--------|--------------------------------------------------------------------------------------------------------------------------------------------------------------------------------------------------------------------------------------------------------------------------------------|-----------------------------------|
| Reporting bias assessment     | 14     | Describe any methods used to assess risk of bias due to missing results in a synthesis (arising from reporting biases).                                                                                                                                                              | Par 2.4                           |
| Certainty assessment          | 15     | Describe any methods used to assess certainty (or confidence) in the body of evidence for an outcome.                                                                                                                                                                                | Par 2.5, Par 2.6                  |
| <b>RESULTS</b>                |        |                                                                                                                                                                                                                                                                                      |                                   |
| Study selection               | 16a    | Describe the results of the search and selection process, from the number of records identified in the search to the number of studies included in the review, ideally using a flow diagram.                                                                                         | Results first paragraph, Figure 1 |
|                               | 16b    | Cite studies that might appear to meet the inclusion criteria, but which were excluded, and explain why they were excluded.                                                                                                                                                          | Suppl table 2                     |
| Study characteristics         | 17     | Cite each included study and present its characteristics.                                                                                                                                                                                                                            | Suppl table 3                     |
| Risk of bias in studies       | 18     | Present assessments of risk of bias for each included study.                                                                                                                                                                                                                         | Par 3.2.10, Suppl table 4         |
| Results of individual studies | 19     | For all outcomes, present, for each study: (a) summary statistics for each group (where appropriate) and (b) an effect estimate and its precision (e.g. confidence/credible interval), ideally using structured tables or plots.                                                     | Throughout results                |
| Results of syntheses          | 20a    | For each synthesis, briefly summarise the characteristics and risk of bias among contributing studies.                                                                                                                                                                               | Throughout results                |
|                               | 20b    | Present results of all statistical syntheses conducted. If meta-analysis was done, present for each the summary estimate and its precision (e.g. confidence/credible interval) and measures of statistical heterogeneity. If comparing groups, describe the direction of the effect. | Throughout results                |
|                               | 20c    | Present results of all investigations of possible causes of heterogeneity among study results.                                                                                                                                                                                       | Throughout results                |
|                               | 20d    | Present results of all sensitivity analyses conducted to assess the robustness of the synthesized results.                                                                                                                                                                           | Par 3.2.9                         |
| Reporting biases              | 21     | Present assessments of risk of bias due to missing results (arising from reporting biases) for each synthesis assessed.                                                                                                                                                              | Throughout results                |
| Certainty of evidence         | 22     | Present assessments of certainty (or confidence) in the body of evidence for each outcome assessed.                                                                                                                                                                                  | Throughout results                |
| <b>DISCUSSION</b>             |        |                                                                                                                                                                                                                                                                                      |                                   |
| Discussion                    | 23a    | Provide a general interpretation of the results in the context of other evidence.                                                                                                                                                                                                    | Throughout discussion             |
|                               | 23b    | Discuss any limitations of the evidence included in the review.                                                                                                                                                                                                                      | Strengths and limitation section  |
|                               | 23c    | Discuss any limitations of the review processes used.                                                                                                                                                                                                                                | Strengths and limitation section  |
|                               | 23d    | Discuss implications of the results for practice, policy, and future research.                                                                                                                                                                                                       | Throughout discussion             |
| <b>OTHER INFORMATION</b>      |        |                                                                                                                                                                                                                                                                                      |                                   |
| Registration and protocol     | 24a    | Provide registration information for the review, including register name and registration number, or state that the review was not registered.                                                                                                                                       | Methods, first paragraph          |
|                               | 24b    | Indicate where the review protocol can be accessed, or state that a protocol was not prepared.                                                                                                                                                                                       | Methods, first paragraph          |
|                               | 24c    | Describe and explain any amendments to information provided at registration or in the protocol.                                                                                                                                                                                      | Strengths and limitation section  |
| Support                       | 25     | Describe sources of financial or non-financial support for the review, and the role of the funders or sponsors in the review.                                                                                                                                                        | N.A.                              |
| Competing interests           | 26     | Declare any competing interests of review authors.                                                                                                                                                                                                                                   | N.A.                              |

| Section and Topic                              | Item # | Checklist item                                                                                                                                                                                                                             | Location where item is reported |
|------------------------------------------------|--------|--------------------------------------------------------------------------------------------------------------------------------------------------------------------------------------------------------------------------------------------|---------------------------------|
| Availability of data, code and other materials | 27     | Report which of the following are publicly available and where they can be found: template data collection forms; data extracted from included studies; data used for all analyses; analytic code; any other materials used in the review. | Title page                      |

**Supplementary table 2: Excluded studies**

| <b>Reference</b>                                                                                                                                                                                                                                                        | <b>Reason for exclusion</b> |
|-------------------------------------------------------------------------------------------------------------------------------------------------------------------------------------------------------------------------------------------------------------------------|-----------------------------|
| Analysis of covid-19 in patients with immunosuppression and kidney transplantation in mexico. <i>Atencion Familiar</i> . 2020;27:25-8.                                                                                                                                  | Foreign language            |
| The impact of comorbidities on clinical course and outcome, in kidney transplant recipients with COVID-19: A systematic review and analysis. <i>Indian Journal of Transplantation</i> . 2020;14(4):275-82.                                                              | Wrong study design          |
| Early experience with COVID-19 and solid organ transplantation at a US high-volume transplant center. <i>Transplantation</i> . 2020;104(11):2208-14.                                                                                                                    | No data for KTR             |
| First Reported Case in Romania of a Successfully Treated Severe COVID-19 in a Kidney Transplant Recipient: A Focus on Acute Kidney Injury. <i>Case Reports in Nephrology and Dialysis</i> . 2020:174-9.                                                                 | <5 patients included        |
| COVID-19 outcomes among solid organ transplant recipients: A matched case-control study. <i>Hepatology</i> . 2020;72(1):269A-70A.                                                                                                                                       | No data for KTR             |
| Characteristics and outcomes of solid organ transplant patients with COVID-19 at a north texas community based transplant center. <i>Hepatology</i> . 2020;72(1):261A-A.                                                                                                | <5 patients included        |
| Le rôle du registre national REIN en France dans la veille sanitaire des patients en insuffisance rénale chronique terminale infectés par le SARS-CoV-2: organisation et premières données. <i>Néphrologie &amp; Thérapeutique</i> . 2021.                              | Foreign language            |
| Abu Jawdeh BG. COVID-19 in Kidney Transplantation: Outcomes, Immunosuppression Management, and Operational Challenges. <i>Adv Chronic Kidney Dis</i> . 2020;27(5):383-9.                                                                                                | No outcomes of interest     |
| Ajai C, Mehmet KS, Joaquin M-L, Gordon C, Noa B, Kwee Y, et al. Clinical Features Associated with COVID-19 Outcome in MM: First Results from International Myeloma Society COVID-19 Dataset. 2020.                                                                      | No data for KTR             |
| Akdur A, Karakaya E, Ayzazoglu Soy EH, Alshalabi O, Kirnap M, Arslan H, et al. Coronavirus Disease (COVID-19) in Kidney and Liver Transplant Patients: A Single-Center Experience. <i>Exp Clin Transplant</i> . 2020;18(3):270-4.                                       | <5 patients included        |
| Akilesh S, Nast CC, Yamashita M, Henriksen K, Charu V, Troxell ML, et al. Multicenter Clinicopathologic Correlation of Kidney Biopsies Performed in COVID-19 Patients Presenting With Acute Kidney Injury or Proteinuria. <i>Am J Kidney Dis</i> . 2021;77(1):82-93.e1. | <5 patients included        |
| Al Azzi Y, Ajaimy M, Liriano-Ward LE, Py dath CT, Campos PL, igam PB, et al. Clinical outcomes of hospitalized kidney transplant recipients with COVID-19 in a predominantly minority population. <i>Jour I of the American Society of Nephrology</i> . 2020;31:277-8.  | Duplicate                   |
| Alberici F, Delbarba E, Manenti C, Econimo L, Valerio F, Pola A, et al. Management Of Patients On Dialysis And With Kidney Transplant During SARS-COV-2 (COVID-19) Pandemic In Brescia, Italy. 2020.                                                                    | Duplicate                   |

|                                                                                                                                                                                                                                                                                                 |                         |
|-------------------------------------------------------------------------------------------------------------------------------------------------------------------------------------------------------------------------------------------------------------------------------------------------|-------------------------|
| Alfishawy M, Elbendary A, Mohamed M, Nassar M. COVID-19 Mortality in Transplant Recipients. International Journal of Organ Transplantation Medicine. 2020;11(4):145-62.                                                                                                                         | Wrong study design      |
| Anft M, Blazquez-Navarro A, Stervbo U, Witzke O, Wirth R, Choi M, et al. PRE-EXISTING SARS-COV-2 REACTIVE T CELLS IN RENAL TRANSPLANT PATIENTS. Transplant International. 2020;33:11-2.                                                                                                         | Wrong study design      |
| Angeletti A, Trivelli A, Magnasco A, Drov, i S, Sanguineri F, et al. Risk of COVID-19 in young kidney transplant recipients. Results from a single-center observational study. Clin Transplant. 2020;34(7):e13889-e.                                                                            | <5 patients included    |
| Antony SJ, Singh J, de Jesus M, Lance J. Early use of tocilizumab in respiratory failure associated with acute COVID -19 pneumonia in recipients with solid organ transplantation. IDCases. 2020(21).                                                                                           | <5 patients included    |
| Aziz F, elbrot D, Singh T, Parajuli S, esh, Garg N, et al. Early Report on Published Outcomes in Kidney Transplant Recipients Compared to Nontransplant Patients Infected With Coronavirus Disease 2019. Transplant Proc. 2020;52(9):2659-62.                                                   | Wrong study design      |
| Aziz F, Muth B, Parajuli S, esh, Garg N, Mohamed M, et al. Unusually high rates of acute rejection during the COVID-19 pandemic: cause for concern? Kidney Int. 2020;98(2):513-4.                                                                                                               | Wrong study design      |
| Aziz H, Lashkari N, Yoon YC, Kim J, Sher LS, Genyk Y, et al. Effects of Coronavirus Disease 2019 on Solid Organ Transplantation. Transplant Proc. 2020;52(9):2642-53.                                                                                                                           | No data for KTR         |
| Azzi Y, Bartash R, Scalea J, Loarte-Campos P, Akalin E. COVID-19 and Solid Organ Transplantation: A Review Article. Transplantation. 2021;105(1):37-55.                                                                                                                                         | Wrong study design      |
| Azzi Y, Parides M, Alani O, Loarte-Campos P, Bartash R, Forest S, et al. COVID-19 infection in kidney transplant recipients at the epicenter of pandemics. Kidney Int. 2020;98(6):1559-67.                                                                                                      | Duplicate               |
| Bae S, McAdams-DeMarco MA, Massie AB, Ahn JB, Werbel WA, Brennan DC, et al. Early Changes in Kidney Transplant Immunosuppression Regimens During the COVID-19 Pandemic. Transplantation. 2021;105(1):170-6.                                                                                     | Wrong study design      |
| Bell S, Campbell J, McDo ld J, Neill M, Watters C, Buck K, et al. COVID-19 in patients undergoing chronic kidney replacement therapy and kidney transplant recipients in Scotland: findings and experience from the Scottish re l registry. BMC Nephrol. 2020;21(1):419-.                       | No outcomes of interest |
| Benotmane I, Gautier-Vargas G, Wendling M-J, Perrin P, Velay A, Bass, et al. In-depth virological assessment of kidney transplant recipients with COVID-19. Am J Transplant. 2020;20(11):3162-72.                                                                                               | Duplicate               |
| Benotmane I, Gautier Vargas G, Velay A, Wendling M-J, Perrin P, Fafi-Kremer S, et al. Persistence of SARS-CoV-2 antibodies in kidney transplant recipients. Am j transplant. 2020.                                                                                                              | No outcomes of interest |
| Binda B, Picchi G, Carucci AC, Sinatti G, Di Norcia M, Grimaldi A, et al. Follow-up and Management of Kidney Transplant Recipients During the COVID-19 Lockdown: The Experience of an Italian Transplant Center, Including Two Cases of COVID-19 Pneumonia. Transplant Proc. 2020;52(9):2614-9. | No outcomes of interest |

|                                                                                                                                                                                                                                                             |                         |
|-------------------------------------------------------------------------------------------------------------------------------------------------------------------------------------------------------------------------------------------------------------|-------------------------|
| Bösch F, Börner N, Kemmner S, Lampert C, Jacob S, Koliogiannis D, et al. Attenuated early inflammatory response in solid organ recipients with COVID-19. Clin Transplant. 2020;34(10):e14027-e.                                                             | <5 patients included    |
| Boyarsky BJ, Massie AB, Love AD, Werbel WA, Dur, M. C, et al. Early Experiences With COVID-19 Testing in Transplantation. Transplant Direct. 2020;6(7):e572-e.                                                                                              | Wrong study design      |
| Braun G, Villa L, Krueger T, Rauen T, Floege J, Muehlfeld A. OUTCOMES OF COVID-2019 IN RENAL TRANSPLANT RECIPIENTS VERSUS CHRONIC HEMODIALYSIS PATIENTS: ANALYSIS OF A REGIONAL COHORT. Transplant International. 2020;33:12-.                              | No outcomes of interest |
| Caillard S, Anglicheau D, Matignon M, Durrbach A, Greze C, Frimat L, et al. An initial report from the French SOT COVID Registry suggests high mortality due to COVID-19 in recipients of kidney transplants. Kidney Int. 2020;98(6):1549-58.               | Wrong study design      |
| Caillard S, Anglicheau D, Matignon M, Durrbach A, Greze C, Frimat L, et al. An initial report from the French SOT COVID Registry suggests high mortality due to COVID-19 in recipients of kidney transplants. Kidney Int. 2020;98(6):1549-58.               | Duplicate               |
| Chang TS, Ding Y, Freund MK, Johnson R, Schwarz T, Yabu JM, et al. Prior diagnoses and medications as risk factors for COVID-19 in a Los Angeles Health System. 2020.                                                                                       | No data for KTR         |
| Choi M, Bachmann F, Naik MG, Duettmann W, Duerr M, Zukunft B, et al. Low Seroprevalence of SARS-CoV-2 Antibodies during Systematic Antibody Screening and Serum Responses in Patients after COVID-19 in a German Transplant Center. J Clin Med. 2020;9(11). | No outcomes of interest |
| Christensen J, Kumar D, Moinuddin I, Bryson A, ra, Kashi Z, et al. Coro virus Disease 2019 Viremia, Serologies, and Clinical Course in a Case Series of Transplant Recipients. Transplant Proc. 2020;52(9):2637-41.                                         | <5 patients included    |
| Christensen J, Kumar D, Moinuddin I, Bryson A, Kashi Z, Kimball P, et al. Coronavirus Disease 2019 Viremia, Serologies, and Clinical Course in a Case Series of Transplant Recipients. Transplant Proc. 2020.                                               | Duplicate               |
| Coates PT, Wong G, Druke T, Rovin B, Ronco P. Early experience with COVID-19 in kidney transplantation. Kidney Int. 2020;97(6):1074-5.                                                                                                                      | Wrong study design      |
| Cravedi P, Mothi SS, Azzi Y, Haverly M, Farouk SS, Pérez-Sáez MJ, et al. COVID-19 and kidney transplantation: Results from the TANGO International Transplant Consortium. Am J Transplant. 2020;20(11):3140-8.                                              | Duplicate               |
| Cucchiari D, Guillén E, Cofan F, Torregrosa J-V, Esforzado N, Revuelta I, et al. Taking care of kidney transplant recipients during the COVID-19 pandemic: Experience from a medicalized hotel. Clin Transplant. 2020:e14132-e.                             | Wrong study design      |
| Demir E, Uyar M, Parmaksiz E, Si ngil A, Yelken B, Dirim AB, et al. COVID-19 infection in kidney transplant recipients: A multicenter experience in Istanbul. Jour I of the American Society of Nephrology. 2020;31:284-.                                   | No outcomes of interest |
| Fernández-Ruiz M, Aguado JM. Immunomodulatory Therapies for COVID-19 in Solid Organ Transplant Recipients. Curr Transplant Rep. 2020:1-11.                                                                                                                  | No data for KTR         |

|                                                                                                                                                                                                                                                                                                                                |                         |
|--------------------------------------------------------------------------------------------------------------------------------------------------------------------------------------------------------------------------------------------------------------------------------------------------------------------------------|-------------------------|
| Fava A, Montero N, Cucchiari D, Toapanta N, Centellas J, Vila-Santadreu A, et al. SARS-CoV-2 in Kidney Transplant Recipients: A Multicentric Prospective Cohort Study. 2020.                                                                                                                                                   | Duplicate               |
| Gasparini M, Khan S, Patel JM, Parekh D, Bangash MN, Stümpfle R, et al. Renal impairment and its impact on clinical outcomes in patients who are critically ill with COVID-19: a multicentre observational study. <i>Anaesthesia</i> . 2020.                                                                                   | Wrong study design      |
| Gautier SV, Shevchenko AO, Tsiurlikova OM, Khomyakov SM, Kotenko ON, Vinogradov VE, et al. COVID-19 in solid organ transplant recipients: Initial report from national multicenter observational study «rokkor-recipient». <i>Vestnik Transplantologii i Iskusstvennykh Organov</i> . 2020;22(3):8-17.                         | No data for KTR         |
| Gisondi P, Zaza G, Del Giglio M, Rossi M, Iacono V, Girolomoni G. Risk of hospitalization and death from COVID-19 infection in patients with chronic plaque psoriasis receiving a biologic treatment and renal transplant recipients in maintenance immunosuppressive treatment. <i>J Am Acad Dermatol</i> . 2020;83(1):285-7. | <5 patients included    |
| Gleeson S, Noori M, Lightstone L, Webster P. Lesson for the clinical nephrologist: Kidney transplant, COVID-19 and pregnancy. <i>J nephrol</i> . 2020.                                                                                                                                                                         | <5 patients included    |
| Golfini I, Delsante M, Fiaccadori E, Zaza G, Manenti L, Degli Antoni A, et al. COVID-19 in kidney transplant recipients. <i>Am J Transplant</i> . 2020;20(7):1941-3.                                                                                                                                                           | <5 patients included    |
| González JCG. Early experience with COVID-19 in kidney transplantation recipients: update and review. <i>Int braz j urol</i> . 2020;46:145-55.                                                                                                                                                                                 | Wrong study design      |
| González-Díaz A, Abad-López P, Peña-Vallejo E, Caro-González MP, Calzas-Montalvo C, Gil-Moradillo J, et al. Urological surgery during SARS-CoV-2 pandemic. Descriptive analysis of the experience in a Urology Department across the pandemic phases. <i>Actas Urol Esp</i> . 2020;44(10):665-73.                              | Wrong study design      |
| Goss MB, Galván NTN, Ruan W, Munoz FM, Brewer ED, Mahony CA, et al. The Pediatric Solid Organ Transplant Experience with COVID-19: An Initial Multi-Center, Multi-Organ Case Series. <i>Pediatr Transplant</i> . 2020:e13868-e.                                                                                                | No data for KTR         |
| Hartzell S, Bin S, Benedetti C, Haverly M, Gallon L, Zaza G, et al. Evidence of potent humoral immune activity in COVID-19-infected kidney transplant recipients. <i>Am J Transplant</i> . 2020;20(11):3149-61.                                                                                                                | No outcomes of interest |
| Hasan I, Rashid T, Suliman S, Amer H, R MCMML, Jarmi T, et al. Predictors of disease severity and outcome of hospitalized renal transplant recipients with COVID-19 infection: A systematic review of a globally representative sample. <i>Rom J Intern Med</i> . 2020.                                                        | Wrong study design      |
| Husain SA, Dube G, Morris H, Fern, ez H, Chang J-H, et al. Early Outcomes of Outpatient Management of Kidney Transplant Recipients with Coronavirus Disease 2019. <i>Clin J Am Soc Nephrol</i> . 2020;15(8):1174-8.                                                                                                            | No data for KTR         |
| Hu Q, Zhong Z, Xiong Y, Ye S, Wang Y, Ye Q. Management of immunosuppression in kidney transplant recipients with COVID-19 pneumonia: A summary of 41 confirmed cases reported worldwide. <i>Transpl Infect Dis</i> . 2020:e13425-e.                                                                                            | Wrong study design      |



|                                                                                                                                                                                                                                                                             |                      |
|-----------------------------------------------------------------------------------------------------------------------------------------------------------------------------------------------------------------------------------------------------------------------------|----------------------|
| Imam A, Abukhalaf SA, Imam R, Abu-Gazala S, Merhav H, Khalaileh A. Kidney Transplantation in the Times of COVID-19 - A Literature Review. <i>Ann Transplant.</i> 2020;25:e925755-e.                                                                                         | Wrong study design   |
| Jager KJ, Kramer A, Chesnaye NC, Couchoud C, Sánchez-Álvarez JE, Garneata L, et al. Results from the ERA-EDTA Registry indicate a high mortality due to COVID-19 in dialysis patients and kidney transplant recipients across Europe. <i>Kidney Int.</i> 2020;98(6):1540-8. | Duplicate            |
| Johnson KM, Belfer JJ, Peterson GR, Boelkins MR, Dumkow LE. Managing COVID-19 in Renal Transplant Recipients: A Review of Recent Literature and Case Supporting Corticosteroid-sparing Immunosuppression. <i>Pharmacotherapy.</i> 2020;40(6):517-24.                        | <5 patients included |
| Kates OS, Fisher CE, Stankiewicz-Karita HC, Shepherd A, a K, Church EC, et al. Earliest cases of coronavirus disease 2019 (COVID-19) identified in solid organ transplant recipients in the United States. <i>Am J Transplant.</i> 2020;20(7):1885-90.                      | <5 patients included |
| Katz-Greenberg G, Yadav A, Gulati R, Singh P. Outcomes of COVID-19-positive kidney transplant recipients. <i>Journal of the American Society of Nephrology.</i> 2020;31:281-.                                                                                               | Wrong study design   |
| Katz-Greenberg GYAGMM-CMP, Gulati RALBKSP. Outcomes of COVID-19-positive kidney transplant recipients: A single-center experience. <i>Clinical Nephrology.</i> 2020;94(6):318-.                                                                                             | Duplicate            |
| Kolonko A, Dudzicz S, Wiecek A, Król R. COVID-19 infection in solid organ transplant recipients: A single-center experience with patients immediately after transplantation. <i>Transpl Infect Dis.</i> 2020:e13381-e.                                                      | <5 patients included |
| Krome S. COVID-19: High Mortality after Kidney Transplantation. <i>Transfusionsmedizin.</i> 2020;10(4):193-.                                                                                                                                                                | Wrong study design   |
| Mahalingasivam V, Craik A, Tomlinson LA, Ge L, Hou L, Wang Q, et al. COVID-19 and kidney transplantation: A systematic review. 2020.                                                                                                                                        | Wrong study design   |
| Marinaki S, Tsiakas S, Korogiannou M, Grigorakos K, Papalois V, Boletis I. A Systematic Review of COVID-19 Infection in Kidney Transplant Recipients: A Universal Effort to Preserve Patients' Lives and Allografts. <i>Journal of Clinical Medicine.</i> 2020;9(9):2986-.  | Wrong study design   |
| Marlais M, Wlodkowski T, Al-Akash S, Ananin P, i VK, Baudouin V, et al. COVID-19 in children treated with immunosuppressive medication for kidney diseases. <i>Arch dis child.</i> 2020.                                                                                    | No data for KTR      |
| Marlais MWTSFTK. 1 COVID-19 in children treated with immunosuppressive medication for kidney diseases. <i>Archives of Disease in Childhood.</i> 2020;105:A1-A.                                                                                                              | No data for KTR      |
| Melgosa M, Madrid A, Álvarez O, Lumbreras J, Nieto F, Parada E, et al. SARS-CoV-2 infection in Spanish children with chronic kidney pathologies. <i>Pediatr Nephrol.</i> 2020;35(8):1521-4.                                                                                 | Wrong study design   |
| Mette R, Kasper Bruun K, Anton P, Lars Christian L, Jesper H, Martin Thomsen E, et al. Characteristics and predictors of hospitalization and death in the first 9,519 cases with a positive RT-PCR test for SARS-CoV-2 in Denmark: A nationwide cohort. 2020.               | No data for KTR      |

|                                                                                                                                                                                                                                                                 |                         |
|-----------------------------------------------------------------------------------------------------------------------------------------------------------------------------------------------------------------------------------------------------------------|-------------------------|
| Molnar MZ, Bhalla A, Azhar A, Tsujita M, Talwar M, Balaraman V, et al. Outcomes of critically ill solid organ transplant patients with COVID-19 in the United States. <i>Am J Transplant.</i> 2020;20(11):3061-71.                                              | No data for KTR         |
| Monfared A, Dashti-Khavidaki S, Jafari R, Jafari A, Ramezanzade E, Lebadi M-K, et al. Clinical characteristics and outcome of COVID-19 pneumonia in kidney transplant recipients in Razi hospital, Rasht, Iran. <i>Transpl Infect Dis.</i> 2020;22(6):e13420-e. | No outcomes of interest |
| Montagud-Marrahi E, Cofan F, Torregrosa J-V, Cucchiari D, Ventura-Aguiar P, Revuelta I, et al. Preliminary data on outcomes of SARS-CoV-2 infection in a Spanish single center cohort of kidney recipients. <i>Am J Transplant.</i> 2020;20(10):2958-9.         | Wrong study design      |
| Moosavi SA, Mashhadiagha A, Motazedian N, Hashemazar A, Hoveidaei AH, Bolignano D. COVID-19 clinical manifestations and treatment strategies among solid-organ recipients: A systematic review of cases. <i>Transpl Infect Dis.</i> 2020;22(6):e13427-e.        | Wrong study design      |
| Moris D, Kesseli SJ, Barbas AS. Kidney transplant recipients infected by COVID-19: Review of the initial published experience. <i>Transpl Infect Dis.</i> 2020;22(6):e13426-e.                                                                                  | Wrong study design      |
| Nacif LS, Zanini LY, Waisberg DR, Pinheiro RS, Galvão F, Andraus W, et al. COVID-19 in solid organ transplantation patients: A systematic review. <i>Clinics (Sao Paulo).</i> 2020;75:e1983-e.                                                                  | Wrong study design      |
| Nacif LSZLY, Waisberg DR, Pinheiro RS, Galvão FAWDL. COVID-19 in solid organ transplantation patients: A systematic review. <i>Clinics.</i> 2020;75:e1983-e.                                                                                                    | Duplicate               |
| Nair V, ovitz N, Abate M, Bhaskaran MC, Nair GD, Molmenti EP. COVID-19 and kidney transplant outcomes. <i>Journal of the American Society of Nephrology.</i> 2020;31:285-.                                                                                      | Duplicate               |
| Nair V, ovitz N, Abate M, Nair GD, Bhaskaran MC, Molmenti EP. Risk factors for mortality in kidney transplant recipients with COVID-19. <i>Journal of the American Society of Nephrology.</i> 2020;31:278-9.                                                    | Wrong study design      |
| Oltean M, Søftel, Mackay J, Bagge J, Ekelund J, Felldin M, et al. Covid-19 in kidney transplant recipients: a systematic review of the case series available three months into the pandemic. <i>Infect Dis (Lond).</i> 2020;52(11):830-7.                       | Wrong study design      |
| Ortiz AET, Walker JB, Velez JCQ, Garces JC. COVID-19 in kidney transplant recipients: Experience from a large health system in Louisiana. <i>Journal of the American Society of Nephrology.</i> 2020;31:754-.                                                   | Wrong study design      |
| Pereira MR, Aversa MM, Farr MA, Miko BA, Aaron JG, Mohan S, et al. Tocilizumab for severe COVID-19 in solid organ transplant recipients: a matched cohort study. <i>Am J Transplant.</i> 2020;20(11):3198-205.                                                  | No data for KTR         |
| Pereira MR, Mohan S, Cohen DJ, Husain SA, Dube GK, Ratner LE, et al. COVID-19 in solid organ transplant recipients: Initial report from the US epicenter. <i>Am J Transplant.</i> 2020;20(7):1800-8.                                                            | No data for KTR         |
| Phanish M, Ster IC, Ghazanfar A, Cole N, Quan V, Hull R, et al. Systematic review and meta-analysis of COVID-19 and kidney transplant recipients, the South West London Kidney Transplant Network experience. 2020.                                             | Wrong study design      |

|                                                                                                                                                                                                                                                                                                                             |                         |
|-----------------------------------------------------------------------------------------------------------------------------------------------------------------------------------------------------------------------------------------------------------------------------------------------------------------------------|-------------------------|
| Predecki M, Clarke C, ice, Gleeson S, Greathead L, Santos E, et al. Detection of SARS-CoV-2 Antibodies in Kidney Transplant Recipients. <i>J Am Soc Nephrol</i> . 2020;31(12):2753-6.                                                                                                                                       | No outcomes of interest |
| Raja MA, Mendoza MA, Villavicencio A, Anjan S, Reynolds JM, Kittipibul V, et al. COVID-19 in solid organ transplant recipients: A systematic review and meta-analysis of current literature. <i>Transplant Rev (Orlando)</i> . 2020;35(1):100588-.                                                                          | Wrong study design      |
| Revuelta I, Santos-Arteaga FJ, Montagud-Marrahi E, Ventura-Aguar P, Di Caprio D, Cucchiari D, et al. A machine learning-based predictive model for outcome of COVID-19 in kidney transplant recipients. <i>Journal of the American Society of Nephrology</i> . 2020;31:281-.                                                | No outcomes of interest |
| Rinaldi M, Bartoletti M, Bussini L, Pancaldi L, Pascale R, Comai G, et al. COVID-19 in solid organ transplant recipients: No difference in survival compared to general population. <i>Transpl Infect Dis</i> . 2020:e13421-e.                                                                                              | No data for KTR         |
| Ringer M, Azmy V, Kaman K, Tang D, Cheung H, Azar MM, et al. A retrospective matched cohort single-center study evaluating outcomes of COVID-19 and the impact of immunomodulation on COVID-19-related cytokine release syndrome in solid organ transplant recipients. <i>Transpl Infect Dis</i> . 2020:e13556-e.           | No data for KTR         |
| Samira B, Jacqueline C, Jackie M, Chrissie W, Katharine B, Zoe C, et al. COVID-19 in patients undergoing renal replacement therapy in Scotland: findings and experience from the Scottish Renal Registry. 2020.                                                                                                             | Duplicate               |
| Sánchez Cadena AD, Negreira Caamaño M, Pérez Serrano R, Porras Leal ML. Intravenous immunoglobulins: A therapeutic alternative to consider in kidney transplant patients with COVID-19. <i>Nefrologia (Madrid)</i> . 2020.                                                                                                  | Foreign language        |
| Santeusanio AD, Zendel A, Fenig Y, Mahamid A, Bhansali A, De Boccardo G, et al. Kidney transplantation using lymphocyte depleting induction and standard maintenance immunosuppression at the height of the SARS-CoV-2 pandemic in New York City: A single-center experience. <i>Clin Transplant</i> . 2020;34(9):e14055-e. | <5 patients included    |
| Sharma P, Chen V, Fung CM, Troost JP, Patel VN, Combs M, et al. COVID-19 Outcomes Among Solid Organ Transplant Recipients: A Case-control Study. <i>Transplantation</i> . 2021;105(1):128-37.                                                                                                                               | No data for KTR         |
| Shetty AA, Tawhari I, Safar-Boueri L, Seif N, Alahmadi A, Gargiulo R, et al. COVID-19-Associated Glomerular Disease. <i>J Am Soc Nephrol</i> . 2021;32(1):33-40.                                                                                                                                                            | <5 patients included    |
| Shingare A, Bahadur MM, Raina S. COVID-19 in recent kidney transplant recipients. <i>Am J Transplant</i> . 2020;20(11):3206-9.                                                                                                                                                                                              | <5 patients included    |
| Taher A, Alalwan AA, Naser N, Alesgai O, Alaradi A. Acute Kidney Injury in COVID-19 Pneumonia: A Single-Center Experience in Bahrain. <i>Cureus</i> . 2020;12(8):e9693-e.                                                                                                                                                   | No data for KTR         |
| Teoh CW, Gaudreault-Tremblay MM, Blydt-Hansen TD, Goldberg A, Arora S, Feber J, et al. Management of Pediatric Kidney Transplant Patients During the COVID-19 Pandemic: Guidance From the Canadian Society of Transplantation Pediatric Group. <i>Canadian Journal of Kidney Health and Disease</i> . 2020;7.               | Wrong study design      |

|                                                                                                                                                                                                                                                                         |                         |
|-------------------------------------------------------------------------------------------------------------------------------------------------------------------------------------------------------------------------------------------------------------------------|-------------------------|
| Thaunat O, Legeai C, Anglicheau D, Couzi L, Blancho G, Hazzan M, et al. IMPact of the COVID-19 epidemic on the moRTAlity of kidney transplant recipients and candidates in a French tionwide registry sTudy (IMPORTANT). <i>Kidney Int.</i> 2020;98(6):1568-77.         | Wrong study design      |
| Thaunat O, Legeai C, Anglicheau D, Couzi L, Blancho G, Hazzan M, et al. IMPact of the COVID-19 epidemic on the moRTAlity of kidney transplant recipients and candidates in a French Nationwide registry sTudy (IMPORTANT). <i>Kidney Int.</i> 2020;98(6):1568-77.       | Duplicate               |
| Tschopp J, Huillier AG, Mombelli M, Mueller NJ, Khanna N, Garzoni C, et al. First experience of SARS-CoV-2 infections in solid organ transplant recipients in the Swiss Transplant Cohort Study. <i>Am J Transplant.</i> 2020;20(10):2876-82.                           | No data for KTR         |
| Vinson A, a J, Chong AS, Clegg D, Falk C, Foster BJ, et al. SEX MATTERS - COVID-19 IN KIDNEY TRANSPLANTATION. <i>Kidney int.</i> 2021.                                                                                                                                  | Wrong study design      |
| Virmani S, Gleeson SE, Girone GF, Malhotra D, Cohen EA, Klarman SE, et al. Identifying a Kidney Transplant Recipient COVID Phenotype to Aid Test Utilization in the Setting of Limited Testing Availability-Does One Exist? <i>Transplant Proc.</i> 2020;52(9):2584-91. | No outcomes of interest |
| Yang X, Tian S, Guo H. Acute kidney injury and renal replacement therapy in COVID-19 patients: A systematic review and meta-analysis. <i>Int Immunopharmacol.</i> 2020:107159-.                                                                                         | Wrong study design      |
| Yi SG, Rogers AW, Saharia A, Aoun M, Faour R, Abdelrahim M, et al. Early Experience With COVID-19 and Solid Organ Transplantation at a US High-volume Transplant Center. <i>Transplantation.</i> 2020;104(11):2208-14.                                                  | Duplicate               |
| Zhang H, Chen Y, Yuan Q, Xia Q-X, Zeng X-P, Peng J-T, et al. Identification of Kidney Transplant Recipients with Coro virus Disease 2019. <i>Eur Urol.</i> 2020;77(6):742-7.                                                                                            | Wrong study design      |
| Zhong Z, Zhang Q, Xia H, Wang A, Liang W, Zhou W, et al. Clinical characteristics and immunosuppressant management of coronavirus disease 2019 in solid organ transplant recipients. <i>Am J Transplant.</i> 2020;20(7):1916-21.                                        | <5 patients included    |
| Zhu L, Gong N, Liu B, Lu X, Chen D, Chen S, et al. Coro virus Disease 2019 Pneumonia in Immunosuppressed Re l Transplant Recipients: A Summary of 10 Confirmed Cases in Wuhan, Chi . <i>Eur Urol.</i> 2020;77(6):748-54.                                                | Duplicate               |

### Supplementary table 3: included studies

1. Clinical profile of SARS-CoV-2 infection in kidney transplant patients - A single centre observational study. *Indian Journal of Transplantation.* 2020;14(4):288-92.
2. 531. COVID-19 infection outcome in African American Renal Transplant recipients: Detroit Medical Center experience. *Open Forum Infectious Diseases.* 2020;7:S332-S3.
3. 530. COVID-19 in kidney transplant recipients: Single-center experience and case-control study. *Open Forum Infectious Diseases.* 2020;7:S332-S.
4. ESKD Patients with COVID-19 vs. Kidney Transplant Recipients with COVID-19. *Journal of the American Society of Nephrology.* 2020;31:280-.
5. SARS-CoV-2 in Kidney Transplant and Wait-listed patients during the first peak: The Welsh Experience. *Transplantation Proceedings.* 2020.

6. COVID-19 in Kidney Transplant Patients from a Large UK Transplant Centre: Exploring Risk Factors for Disease Severity. *Transplantation Proceedings*. 2020.
7. Early Description of Coronavirus 2019 Disease in Kidney Transplant Recipients in New York. *J Am Soc Nephrol*. 2020;31(6):1150-6.
8. Abolghasemi S, Mardani M, Sali S, Honarvar N, Baziboroun M. COVID-19 and kidney transplant recipients. *Transpl Infect Dis*. 2020;22(6):e13413-e.
9. Abrishami A, Samavat S, Behnam B, Arab-Ahmadi M, Nafar M, Sanei Taheri M. Clinical Course, Imaging Features, and Outcomes of COVID-19 in Kidney Transplant Recipients. *Eur Urol*. 2020;78(2):281-6.
10. Akalin E, Azzi Y, Bartash R, Seethamraju H, Parides M, Hemmige V, et al. Covid-19 and Kidney Transplantation. *N Engl J Med*. 2020;382(25):2475-7.
11. Alberici F, Delbarba E, Manenti C, Econimo L, Valerio F, Pola A, et al. A single center observational study of the clinical characteristics and short-term outcome of 20 kidney transplant patients admitted for SARS-CoV2 pneumonia. *Kidney Int*. 2020;97(6):1083-8.
12. Ali Malekhosseini S, Nikoupour H, Gholami S, Shamsaeefar A, Arasteh P, Kazemi K, et al. A Report of 85 Cases of COVID-19 and Abdominal Transplantation From a Single Center: What Are the Associated Factors With Death Among Organ Transplantation Patients. *Transplantation*. 2021;105(1):90-9.
13. Ali T, Al-Ali A, Fajji L, Hammad E, Nazmi A, Alahmadi I, et al. Coronavirus Disease-19: Disease Severity and Outcomes of Solid Organ Transplant Recipients: Different Spectrums of Disease in Different Populations? *Transplantation*. 2021;105(1):121-7.
14. Arenas MD, Crespo M, Pérez-Sáez MJ, Collado S, Redondo-Pachón D, Llinàs-Mallol L, et al. Clinical Profiles in Renal Patients with COVID-19. 2020;9(8).
15. Azzi Y, Parides M, Alani O, Loarte-Campos P, Bartash R, Forest S, et al. COVID-19 infection in kidney transplant recipients at the epicenter of pandemics. *Kidney Int*. 2020;98(6):1559-67.
16. Banerjee D, Popoola J, Shah S, Ster IC, Quan V, Phanish M. COVID-19 infection in kidney transplant recipients. *Kidney Int*. 2020;97(6):1076-82.
17. Benotmane I, Perrin P, Vargas GG, Bass X, Keller N, et al. Biomarkers of Cytokine Release Syndrome Predict Disease Severity and Mortality From COVID-19 in Kidney Transplant Recipients. *Transplantation*. 2021;105(1):158-69.
18. Bossini N, Alberici F, Delbarba E, Valerio F, Manenti C, Possenti S, et al. Kidney transplant patients with SARS-CoV-2 infection: The Brescia Renal COVID task force experience. *Am J Transplant*. 2020;20(11):3019-29.
19. Caillard S, Chavarot N, Francois H, Matignon M, Greze C, Kamar N, et al. Is Covid-19 infection more severe in kidney transplant recipients? *Am j transplant*. 2020.
20. Carlos S, Yoona R, Edward H, Oyedolamu O, Erik S, Vasil P, et al. Comparative Incidence and Outcomes of COVID-19 in Kidney or Kidney-Pancreas Transplant Recipients Versus Kidney or Kidney-Pancreas Waitlisted Patients: A Pilot Study. 2020.
21. Chaudhry ZS, Williams JD, Vahia A, Fadel R, Parraga Acosta T, Prashar R, et al. Clinical characteristics and outcomes of COVID-19 in solid organ transplant recipients: A cohort study. *Am J Transplant*. 2020;20(11):3051-60.
22. Chavarot N, Gueguen J, Bonnet G, Jdidou M, Trimaille A, Burger C, et al. COVID-19 severity in kidney transplant recipients is similar to non-transplant patients with similar comorbidities. *Am j transplant*. 2020.

23. Chen TY, Farghaly S, Cham S, Tatem LL, Sin JH, Rauda R, et al. COVID-19 pneumonia in kidney transplant recipients: Focus on immunosuppression management. *Transpl Infect Dis.* 2020;22(5):e13378-e.
24. Clarke C, ice, Lucisano G, Predecki M, Gleeson S, Martin P, et al. Informing the risk of kidney transplantation versus remaining on the wait list in the COVID-19 era. 2020.
25. Coll E, Fernández-Ruiz M, Sánchez-Álvarez JE, Martínez-Fernández JR, Crespo M, Gayoso J, et al. COVID-19 in transplant recipients: The Spanish experience. *Am j transplant.* 2020.
26. Corcillo A, Cohen S, Game D, Karalliedde J. High prevalence of Afro-Caribbean ethnicity and hypoglycaemia in patients with diabetes and end stage renal disease hospitalized with COVID-19. *Nephrology (Carlton).* 2020.
27. Craig-Schapiro R, Salinas T, Lubetzky M, Abel BT, Sultan S, Lee JR, et al. COVID-19 outcomes in patients waitlisted for kidney transplantation and kidney transplant recipients. *Am j transplant.* 2020.
28. Crespo M, Mazuecos A, Rodrigo E, Gavela E, Villanego F, Sánchez-Alvarez E, et al. Respiratory and Gastrointestinal COVID-19 Phenotypes in Kidney Transplant Recipients. *Transplantation.* 2020;104(11):2225-33.
29. Crespo M, Pérez-Sáez MJ, Redondo-Pachón D, Llinàs-Mallol L, Montero MM, Villar-García J, et al. COVID-19 in elderly kidney transplant recipients. *Am J Transplant.* 2020;20(10):2883-9.
30. Demir E, Uyar M, Parmaksiz E, Sinangil A, Yelken B, Dirim AB, et al. COVID-19 in kidney transplant recipients: A multicenter experience in Istanbul. *Transpl Infect Dis.* 2020;22(5):e13371-e.
31. Devresse A, Belkhir L, Vo B, Ghaye B, Scohy A, Kabamba B, et al. COVID-19 Infection in Kidney Transplant Recipients: A Single-Center Case Series of 22 Cases From Belgium. *Kidney Med.* 2020;4(2):459-66.
32. Dhe, amp, Iacute, r H, amp, Iacute, et al. Clinical course of COVID-19 disease in immunosuppressed renal transplant patients. *Turk J Med Sci.* 2020.
33. Elhadedy MA, Marie Y, Halawa A. COVID-19 in Renal Transplant Recipients: Case Series and a Brief Review of Current Evidence. *Nephron.* 2020:1-7.
34. Elias M, Pievani D, oux C, Louis K, Denis B, ine, et al. COVID-19 Infection in Kidney Transplant Recipients: Disease Incidence and Clinical Outcomes. *J Am Soc Nephrol.* 2020;31(10):2413-23.
35. Favà A, re, Cucchiari D, Montero N, Toapanta N, Centellas FJ, et al. Clinical characteristics and risk factors for severe COVID-19 in hospitalized kidney transplant recipients: A multicentric cohort study. *Am J Transplant.* 2020;20(11):3030-41.
36. Felldin M, Søftel, JM, Magnusson J, Ekberg J, Karason K, et al. Initial Report From a Swedish High-volume Transplant Center After the First Wave of the COVID-19 Pandemic. *Transplantation.* 2021;105(1):108-14.
37. Fung M, Chiu CY, DeVoe C, Doernberg SB, Schwartz BS, Langelier C, et al. Clinical outcomes and serologic response in solid organ transplant recipients with COVID-19: A case series from the United States. *Am J Transplant.* 2020;20(11):3225-33.
38. Georgiades F, Summers DM, Butler AJ, Russell NKI, Clatworthy MR, Torpey N. Renal transplantation during the SARS-CoV-2 pandemic in the UK: Experience from a large-volume center. *Clin Transplant.* 2020:e14150-e.

39. Ghaffari Rahbar M, Nafar M, Khoshdel A, Dalili N, Abrishami A, Firouzan A, et al. Low rate of COVID-19 pneumonia in kidney transplant recipients-A battle between infection and immune response? *Transpl Infect Dis.* 2020;22(5):e13406-e.
40. Hilbr, s LB, Duivenvoorden R, Vart P, Franssen CFM, Hemmelder MH, et al. COVID-19-related mortality in kidney transplant and dialysis patients: results of the ERACODA collaboration. *Nephrol Dial Transplant.* 2020;35(11):1973-83.
41. Hoek RAS, Manintveld OC, Betjes MGH, Hellemons ME, Seghers L, Van Kampen JAA, et al. COVID-19 in solid organ transplant recipients: a single-center experience. *Transpl Int.* 2020;33(9):1099-105.
42. Hussain AU, Eqbal K, Shah R, Dutton M, Berry M. COVID-19 infection in renal transplant patients. *Journal of the American Society of Nephrology.* 2020;31:806-.
43. Jager KJ, Kramer A, Chesnaye NC, Couchoud C, Sánchez-Álvarez JE, Garneata L, et al. Results from the ERA-EDTA Registry indicate a high mortality due to COVID-19 in dialysis patients and kidney transplant recipients across Europe. *Kidney Int.* 2020;98(6):1540-8.
44. Jarrin Tejada CD, Zachariah M, Cruz ABV, Hussein S, Wipula E, Meeks N, et al. Favorable outcome of COVID-19 among African American (AA) renal transplant recipients in Detroit. *Clin Transplant.* 2020:e14169-e.
45. Kates OS, Haydel B, M. y, Florman S, S. e, Rana MM, et al. COVID-19 in solid organ transplant: A multi-center cohort study. *Clin infect dis.* 2020.
46. Katz-Greenberg G, Yadav A, Gupta M, Martinez-Cantarín MP, Gulati R, Ackerman L, et al. Outcomes of COVID-19-positive kidney transplant recipients: A single-center experience. *Clin Nephrol.* 2020;94(6):318-21.
47. Kute VB, Bhalla AK, Guleria S, eep, Ray DS, Bahadur MM, et al. Clinical Profile and Outcome of COVID-19 in 250 Kidney Transplant Recipients: a Multicenter Cohort Study From India. *Transplantation.* 2020.
48. Lubetzky M, Aull MJ, Craig-Schapiro R, Lee JR, Marku-Podvorica J, Salinas T, et al. Kidney allograft recipients, immunosuppression, and coronavirus disease-2019: a report of consecutive cases from a New York City transplant center. *Nephrol Dial Transplant.* 2020;35(7):1250-61.
49. Lubetzky ML, Craig-Schapiro R, Aull MJ, Salinas T, Lee JR, Sultan S, et al. COVID-19 management in New York City kidney transplant recipients: Before and after the apex. *Journal of the American Society of Nephrology.* 2020;31:811-.
50. Lum E, Bunnapradist S, Multani A, Beard OE, Carlson M, Gaynor P, et al. Spectrum of Coronavirus Disease 2019 Outcomes in Kidney Transplant Recipients: A Single-Center Experience. *Transplant Proc.* 2020;52(9):2654-8.
51. Mahmoud H, Ghai S, Francis JM. COVID-19 in kidney transplant recipients at New England's largest safety-net hospital. *Journal of the American Society of Nephrology.* 2020;31:281-2.
52. Mamode N, Ahmed Z, Jones G, Banga N, Motallebzadeh R, Tolley H, et al. Mortality Rates in Transplant Recipients and Transplantation Candidates in a High-prevalence COVID-19 Environment. *Transplantation.* 2021;105(1):212-5.
53. Marathi R, Davis PW, Rivera FHC, Cheungpasitporn W, uri SR, Kovvuru K, et al. COVID-19 in kidney transplant recipients. *Journal of the American Society of Nephrology.* 2020;31:812-3.
54. Maritati F, Cerutti E, Zuccatosta L, Fiorentini A, ro, Finale C, et al. SARS-CoV-2 infection in kidney transplant recipients: Experience of the italian marche region. *Transpl Infect Dis.* 2020;22(5):e13377-e.

55. Mehta SA, Leonard J, Labella P, Cartiera K, Soomro I, Neumann H, et al. Outpatient management of kidney transplant recipients with suspected COVID-19-Single-center experience during the New York City surge. *Transpl Infect Dis.* 2020;22(6):e13383-e.
56. Mehta SA, Rana MM, Motter JD, Small CB, Pereira MR, Stosor V, et al. Incidence and Outcomes of COVID-19 in Kidney and Liver Transplant Recipients With HIV: Report From the National HOPE in Action Consortium. *Transplantation.* 2021;105(1):216-24.
57. Mella A, Mingozzi S, Gallo E, Lavacca A, Rossetti M, Clari R, et al. Case series of six kidney transplanted patients with COVID-19 pneumonia treated with tocilizumab. *Transpl Infect Dis.* 2020;22(6):e13348-e.
58. Meziyerh S, van der Helm D, de Vries APJ. Vulnerabilities in kidney transplant recipients with COVID-19: a single center experience. *Transplant int.* 2020.
59. Michelle L, Meredith A, Rebecca C-S, Jun L, John L, Samuel S, et al. Kidney Allograft Recipients Diagnosed with Coronavirus Disease-2019: A Single Center Report. 2020.
60. Mohamed IH, Chowdary PB, Shetty S, Sammartino C, Sivaprakasam R, Lindsey B, et al. Outcomes of Renal Transplant Recipients With SARS-CoV-2 Infection in the Eye of the Storm: A Comparative Study With Waitlisted Patients. *Transplantation.* 2021;105(1):115-20.
61. Molaei H, Khedmat L, Nemati E, Rostami Z, Saadat SH. Iranian kidney transplant recipients with COVID-19 infection: Clinical outcomes and cytomegalovirus coinfection. *Transpl Infect Dis.* 2020:e13455-e.
62. Nair V, ovitz N, Hirsch JS, Nair G, Abate M, Bhaskaran M, et al. COVID-19 in kidney transplant recipients. *Am J Transplant.* 2020;20(7):1819-25.
63. Ozturk S, Turgutalp K, Arici M, Odabas AR, Altiparmak MR, Aydin Z, et al. Mortality analysis of COVID-19 infection in chronic kidney disease, haemodialysis and renal transplant patients compared with patients without kidney disease: a nationwide analysis from Turkey. *Nephrol Dial Transplant.* 2020;35(12):2083-95.
64. Pascual J, Melilli E, Jiménez-Martín C, González-Monte E, Zárraga S, Gutiérrez-Dalmau A, et al. COVID-19-related Mortality During the First 60 Days After Kidney Transplantation. *Eur Urol.* 2020;78(4):641-3.
65. Pérez-Sáez MJ, Blasco M, Redondo-Pachón D, Ventura-Aguiar P, Bada-Bosch T, Pérez-Flores I, et al. Use of tocilizumab in kidney transplant recipients with COVID-19. *Am J Transplant.* 2020;20(11):3182-90.
66. Riella LV, Mothi SS, Akalin E, Cravedi P. COVID-19 and kidney transplantation: results from the tango international transplant consortium. *Journal of the American Society of Nephrology.* 2020;31:278-.
67. Rodriguez-Cubillo B, de la Higuera MAM, Lucena R, Franci EV, Hurtado M, Romero NC, et al. Should cyclosporine be useful in renal transplant recipients affected by SARS-CoV-2? *Am J Transplant.* 2020;20(11):3173-81.
68. Santeusanio AD, Menon MC, Liu C, Bhansali A, Patel N, Mahir F, et al. Influence of patient characteristics and immunosuppressant management on mortality in kidney transplant recipients hospitalized with coronavirus-2019 (COVID-19). *Clin Transplant.* 2021:e14221-e.
69. Shrivastava P, Prashar R, Khoury N, Patel A, Yeddula S, Kitajima T, et al. Acute Kidney Injury in a Predominantly African American Cohort of Kidney Transplant Recipients With COVID-19 Infection. *Transplantation.* 2021;105(1):201-5.
70. Silva F, Cipriano A, Cruz H, Tavares J, Fragoso J, Malheiro J, et al. SARS-CoV-2 infection in kidney transplant recipients: Early report of five cases. *Transpl Infect Dis.* 2020:e13394-e.



71. Silvano J, Ferreira F, Bustorff M, Nunes AT, Tavares I, Sobrinho Simões J, et al. Viral Clearance and Serological Response to SARS-CoV-2 in Kidney Transplant Recipients. *Transplant proc.* 2020.
72. Trujillo H, Caravaca-Fontán F, Sevillano Á, Gutiérrez E, Fernández-Ruiz M, López-Medrano F, et al. Tocilizumab use in Kidney Transplant Patients with COVID-19. *Clin Transplant.* 2020;34(11):e14072-e.
73. Willicombe M, Gleeson S, Clarke C, ice, Dor F, Predecki M, et al. Identification of Patient Characteristics Associated With SARS-CoV-2 Infection and Outcome in Kidney Transplant Patients Using Serological Screening. *Transplantation.* 2021;105(1):151-7.
74. Zhu L, Gong NQ, Liu B, Lu X, Chen D, Chen S, et al. Infections Coronavirus Disease 2019 Pneumonia in Immunosuppressed Renal Transplant Recipients: A Summary of 10 Confirmed Cases in Wuhan, China. *European Urology.* 2020;77(6):748-54.

**Supplementary table 4: risk of bias assessment**

| Included study reference | 1) Representativeness of the exposed cohort                                                                                                                              | 2) selection of the non-exposed cohort                                                                                                                                         | 3) ascertainment of exposure                                                                              | 4) demonstration that outcome of interest was not present at start of study | 5) comparability of cohorts on the basis of the design or analysis                                           | 6) assessment of outcome                                                                       | 7) was follow-up long enough for outcomes to occur | 8) Adequacy of follow up of cohorts                                                                                                                                                                  |
|--------------------------|--------------------------------------------------------------------------------------------------------------------------------------------------------------------------|--------------------------------------------------------------------------------------------------------------------------------------------------------------------------------|-----------------------------------------------------------------------------------------------------------|-----------------------------------------------------------------------------|--------------------------------------------------------------------------------------------------------------|------------------------------------------------------------------------------------------------|----------------------------------------------------|------------------------------------------------------------------------------------------------------------------------------------------------------------------------------------------------------|
| 1                        | a) truly representative of the area KTR resident in the community * ; b) somewhat representative of the average KTR in the community * ; c) selected group of users eg a | a) drawn from the same community as the exposed cohort * ; b) drawn from a different score c) no description of the derivation of the non exposed cohort ; d) not applicable d | a) secure record (e.g. surgical records) * ; b) structured interview * ; c) written self report ; d) no a | a) yes * ; b) no a                                                          | a) study controls for age, gender, comorbidities confounders * ; b) study does not control for confounders b | a) independent blind assessment * ; b) record linkage * ; c) self report ; d) no description d | a) yes, at least 30 days * ; b) no b               | a) complete follow-up - all subjects accounted for * ; b) subjects lost (o) follow up unlikely to introduce bias - small number lost * ; c) follow up rate <90% and no description of those lost ; a |
| 2                        | b                                                                                                                                                                        | d                                                                                                                                                                              | d                                                                                                         | a                                                                           | b                                                                                                            | d                                                                                              | a                                                  | a                                                                                                                                                                                                    |
| 3                        | b                                                                                                                                                                        | d                                                                                                                                                                              | d                                                                                                         | a                                                                           | a                                                                                                            | d                                                                                              | b                                                  | a                                                                                                                                                                                                    |
| 4                        | a                                                                                                                                                                        | d                                                                                                                                                                              | a                                                                                                         | a                                                                           | a                                                                                                            | d                                                                                              | b                                                  | d                                                                                                                                                                                                    |
| 5                        | a                                                                                                                                                                        | d                                                                                                                                                                              | a                                                                                                         | a                                                                           | a                                                                                                            | d                                                                                              | b                                                  | a                                                                                                                                                                                                    |
| 6                        | a                                                                                                                                                                        | d                                                                                                                                                                              | a                                                                                                         | a                                                                           | a                                                                                                            | d                                                                                              | b                                                  | a                                                                                                                                                                                                    |
| 7                        | a                                                                                                                                                                        | d                                                                                                                                                                              | a                                                                                                         | a                                                                           | b                                                                                                            | d                                                                                              | b                                                  | c                                                                                                                                                                                                    |
| 8                        | a                                                                                                                                                                        | d                                                                                                                                                                              | a                                                                                                         | a                                                                           | b                                                                                                            | d                                                                                              | b                                                  | d                                                                                                                                                                                                    |
| 9                        | b                                                                                                                                                                        | d                                                                                                                                                                              | a                                                                                                         | a                                                                           | b                                                                                                            | d                                                                                              | b                                                  | a                                                                                                                                                                                                    |
| 10                       | a                                                                                                                                                                        | d                                                                                                                                                                              | a                                                                                                         | a                                                                           | b                                                                                                            | d                                                                                              | b                                                  | c                                                                                                                                                                                                    |
| 11                       | a                                                                                                                                                                        | d                                                                                                                                                                              | d                                                                                                         | a                                                                           | b                                                                                                            | d                                                                                              | b                                                  | c                                                                                                                                                                                                    |
| 12                       | b                                                                                                                                                                        | d                                                                                                                                                                              | a                                                                                                         | a                                                                           | a                                                                                                            | d                                                                                              | b                                                  | c                                                                                                                                                                                                    |
| 13                       | a                                                                                                                                                                        | d                                                                                                                                                                              | a                                                                                                         | a                                                                           | b                                                                                                            | d                                                                                              | b                                                  | a                                                                                                                                                                                                    |
| 14                       | b                                                                                                                                                                        | d                                                                                                                                                                              | a                                                                                                         | a                                                                           | a                                                                                                            | d                                                                                              | b                                                  | c                                                                                                                                                                                                    |
| 15                       | a                                                                                                                                                                        | d                                                                                                                                                                              | a                                                                                                         | a                                                                           | a                                                                                                            | d                                                                                              | b                                                  | a                                                                                                                                                                                                    |
| 16                       | b                                                                                                                                                                        | d                                                                                                                                                                              | a                                                                                                         | a                                                                           | b                                                                                                            | d                                                                                              | b                                                  | b                                                                                                                                                                                                    |
| 17                       | b                                                                                                                                                                        | d                                                                                                                                                                              | a                                                                                                         | a                                                                           | b                                                                                                            | d                                                                                              | a                                                  | a                                                                                                                                                                                                    |
| 18                       | b                                                                                                                                                                        | d                                                                                                                                                                              | a                                                                                                         | a                                                                           | a                                                                                                            | d                                                                                              | a                                                  | a                                                                                                                                                                                                    |
| 19                       | b                                                                                                                                                                        | d                                                                                                                                                                              | a                                                                                                         | a                                                                           | a                                                                                                            | d                                                                                              | b                                                  | a                                                                                                                                                                                                    |
| 20                       | a                                                                                                                                                                        | d                                                                                                                                                                              | a                                                                                                         | a                                                                           | b                                                                                                            | d                                                                                              | a                                                  | a                                                                                                                                                                                                    |
| 21                       | b                                                                                                                                                                        | d                                                                                                                                                                              | a                                                                                                         | a                                                                           | a                                                                                                            | d                                                                                              | b                                                  | a                                                                                                                                                                                                    |
| 22                       | b                                                                                                                                                                        | d                                                                                                                                                                              | a                                                                                                         | a                                                                           | a                                                                                                            | d                                                                                              | a                                                  | c                                                                                                                                                                                                    |
| 23                       | b                                                                                                                                                                        | d                                                                                                                                                                              | a                                                                                                         | a                                                                           | a                                                                                                            | d                                                                                              | a                                                  | a                                                                                                                                                                                                    |
| 24                       | b                                                                                                                                                                        | d                                                                                                                                                                              | a                                                                                                         | a                                                                           | b                                                                                                            | d                                                                                              | a                                                  | a                                                                                                                                                                                                    |
| 25                       | a                                                                                                                                                                        | d                                                                                                                                                                              | a                                                                                                         | a                                                                           | a                                                                                                            | d                                                                                              | a                                                  | a                                                                                                                                                                                                    |
| 26                       | b                                                                                                                                                                        | d                                                                                                                                                                              | a                                                                                                         | a                                                                           | b                                                                                                            | d                                                                                              | a                                                  | a                                                                                                                                                                                                    |
| 27                       | a                                                                                                                                                                        | d                                                                                                                                                                              | a                                                                                                         | a                                                                           | a                                                                                                            | d                                                                                              | b                                                  | d                                                                                                                                                                                                    |
| 28                       | a                                                                                                                                                                        | d                                                                                                                                                                              | a                                                                                                         | a                                                                           | a                                                                                                            | d                                                                                              | a                                                  | a                                                                                                                                                                                                    |
| 29                       | b                                                                                                                                                                        | d                                                                                                                                                                              | a                                                                                                         | a                                                                           | a                                                                                                            | d                                                                                              | a                                                  | a                                                                                                                                                                                                    |
| 30                       | a                                                                                                                                                                        | d                                                                                                                                                                              | a                                                                                                         | a                                                                           | b                                                                                                            | d                                                                                              | b                                                  | a                                                                                                                                                                                                    |
| 31                       | a                                                                                                                                                                        | d                                                                                                                                                                              | a                                                                                                         | a                                                                           | b                                                                                                            | d                                                                                              | b                                                  | a                                                                                                                                                                                                    |
| 32                       | b                                                                                                                                                                        | d                                                                                                                                                                              | a                                                                                                         | a                                                                           | b                                                                                                            | d                                                                                              | a                                                  | a                                                                                                                                                                                                    |
| 33                       | b                                                                                                                                                                        | d                                                                                                                                                                              | a                                                                                                         | a                                                                           | b                                                                                                            | d                                                                                              | b                                                  | a                                                                                                                                                                                                    |
| 34                       | b                                                                                                                                                                        | d                                                                                                                                                                              | a                                                                                                         | a                                                                           | b                                                                                                            | d                                                                                              | a                                                  | a                                                                                                                                                                                                    |
| 35                       | a                                                                                                                                                                        | d                                                                                                                                                                              | a                                                                                                         | a                                                                           | b                                                                                                            | d                                                                                              | a                                                  | a                                                                                                                                                                                                    |
| 36                       | a                                                                                                                                                                        | d                                                                                                                                                                              | a                                                                                                         | a                                                                           | a                                                                                                            | d                                                                                              | b                                                  | a                                                                                                                                                                                                    |
| 37                       | a                                                                                                                                                                        | d                                                                                                                                                                              | a                                                                                                         | a                                                                           | b                                                                                                            | d                                                                                              | b                                                  | a                                                                                                                                                                                                    |
| 38                       | b                                                                                                                                                                        | d                                                                                                                                                                              | a                                                                                                         | a                                                                           | b                                                                                                            | d                                                                                              | b                                                  | a                                                                                                                                                                                                    |
| 39                       | a                                                                                                                                                                        | d                                                                                                                                                                              | a                                                                                                         | a                                                                           | b                                                                                                            | d                                                                                              | b                                                  | a                                                                                                                                                                                                    |
| 40                       | b                                                                                                                                                                        | d                                                                                                                                                                              | a                                                                                                         | a                                                                           | a                                                                                                            | d                                                                                              | a                                                  | a                                                                                                                                                                                                    |
| 41                       | b                                                                                                                                                                        | d                                                                                                                                                                              | a                                                                                                         | a                                                                           | a                                                                                                            | d                                                                                              | b                                                  | a                                                                                                                                                                                                    |
| 42                       | a                                                                                                                                                                        | d                                                                                                                                                                              | a                                                                                                         | a                                                                           | b                                                                                                            | d                                                                                              | b                                                  | a                                                                                                                                                                                                    |
| 43                       | a                                                                                                                                                                        | d                                                                                                                                                                              | a                                                                                                         | a                                                                           | a                                                                                                            | d                                                                                              | b                                                  | a                                                                                                                                                                                                    |
| 44                       | b                                                                                                                                                                        | d                                                                                                                                                                              | a                                                                                                         | a                                                                           | b                                                                                                            | d                                                                                              | b                                                  | a                                                                                                                                                                                                    |
| 45                       | a                                                                                                                                                                        | d                                                                                                                                                                              | a                                                                                                         | a                                                                           | a                                                                                                            | d                                                                                              | b                                                  | a                                                                                                                                                                                                    |
| 46                       | b                                                                                                                                                                        | d                                                                                                                                                                              | a                                                                                                         | a                                                                           | b                                                                                                            | d                                                                                              | b                                                  | a                                                                                                                                                                                                    |
| 47                       | a                                                                                                                                                                        | d                                                                                                                                                                              | a                                                                                                         | a                                                                           | b                                                                                                            | d                                                                                              | b                                                  | a                                                                                                                                                                                                    |
| 48                       | a                                                                                                                                                                        | d                                                                                                                                                                              | a                                                                                                         | a                                                                           | b                                                                                                            | d                                                                                              | a                                                  | a                                                                                                                                                                                                    |
| 49                       | a                                                                                                                                                                        | d                                                                                                                                                                              | a                                                                                                         | a                                                                           | b                                                                                                            | d                                                                                              | a                                                  | a                                                                                                                                                                                                    |
| 50                       | a                                                                                                                                                                        | d                                                                                                                                                                              | a                                                                                                         | a                                                                           | b                                                                                                            | d                                                                                              | a                                                  | a                                                                                                                                                                                                    |
| 51                       | b                                                                                                                                                                        | d                                                                                                                                                                              | a                                                                                                         | a                                                                           | b                                                                                                            | d                                                                                              | a                                                  | a                                                                                                                                                                                                    |
| 52                       | b                                                                                                                                                                        | d                                                                                                                                                                              | a                                                                                                         | a                                                                           | b                                                                                                            | d                                                                                              | b                                                  | a                                                                                                                                                                                                    |
| 53                       | b                                                                                                                                                                        | d                                                                                                                                                                              | a                                                                                                         | a                                                                           | b                                                                                                            | d                                                                                              | b                                                  | a                                                                                                                                                                                                    |
| 54                       | a                                                                                                                                                                        | d                                                                                                                                                                              | a                                                                                                         | a                                                                           | b                                                                                                            | d                                                                                              | a                                                  | a                                                                                                                                                                                                    |
| 55                       | a                                                                                                                                                                        | d                                                                                                                                                                              | a                                                                                                         | a                                                                           | b                                                                                                            | d                                                                                              | b                                                  | a                                                                                                                                                                                                    |
| 56                       | b                                                                                                                                                                        | d                                                                                                                                                                              | a                                                                                                         | a                                                                           | b                                                                                                            | d                                                                                              | b                                                  | a                                                                                                                                                                                                    |
| 57                       | b                                                                                                                                                                        | d                                                                                                                                                                              | a                                                                                                         | a                                                                           | b                                                                                                            | d                                                                                              | b                                                  | a                                                                                                                                                                                                    |
| 58                       | a                                                                                                                                                                        | d                                                                                                                                                                              | a                                                                                                         | a                                                                           | b                                                                                                            | d                                                                                              | a                                                  | a                                                                                                                                                                                                    |
| 59                       | a                                                                                                                                                                        | d                                                                                                                                                                              | a                                                                                                         | a                                                                           | b                                                                                                            | d                                                                                              | a                                                  | a                                                                                                                                                                                                    |
| 60                       | a                                                                                                                                                                        | d                                                                                                                                                                              | a                                                                                                         | a                                                                           | b                                                                                                            | d                                                                                              | b                                                  | a                                                                                                                                                                                                    |
| 61                       | b                                                                                                                                                                        | d                                                                                                                                                                              | a                                                                                                         | a                                                                           | b                                                                                                            | d                                                                                              | b                                                  | a                                                                                                                                                                                                    |
| 62                       | b                                                                                                                                                                        | d                                                                                                                                                                              | a                                                                                                         | a                                                                           | b                                                                                                            | d                                                                                              | b                                                  | a                                                                                                                                                                                                    |
| 63                       | b                                                                                                                                                                        | d                                                                                                                                                                              | a                                                                                                         | a                                                                           | b                                                                                                            | d                                                                                              | b                                                  | a                                                                                                                                                                                                    |
| 64                       | b                                                                                                                                                                        | d                                                                                                                                                                              | a                                                                                                         | a                                                                           | b                                                                                                            | d                                                                                              | b                                                  | a                                                                                                                                                                                                    |
| 65                       | b                                                                                                                                                                        | d                                                                                                                                                                              | a                                                                                                         | a                                                                           | a                                                                                                            | d                                                                                              | b                                                  | a                                                                                                                                                                                                    |
| 66                       | b                                                                                                                                                                        | d                                                                                                                                                                              | a                                                                                                         | a                                                                           | a                                                                                                            | d                                                                                              | b                                                  | a                                                                                                                                                                                                    |
| 67                       | b                                                                                                                                                                        | d                                                                                                                                                                              | a                                                                                                         | a                                                                           | b                                                                                                            | d                                                                                              | a                                                  | a                                                                                                                                                                                                    |
| 68                       | b                                                                                                                                                                        | d                                                                                                                                                                              | a                                                                                                         | a                                                                           | b                                                                                                            | d                                                                                              | a                                                  | a                                                                                                                                                                                                    |
| 69                       | b                                                                                                                                                                        | d                                                                                                                                                                              | a                                                                                                         | a                                                                           | a                                                                                                            | d                                                                                              | a                                                  | a                                                                                                                                                                                                    |
| 70                       | b                                                                                                                                                                        | d                                                                                                                                                                              | a                                                                                                         | a                                                                           | b                                                                                                            | d                                                                                              | a                                                  | a                                                                                                                                                                                                    |
| 71                       | b                                                                                                                                                                        | d                                                                                                                                                                              | a                                                                                                         | a                                                                           | a                                                                                                            | d                                                                                              | a                                                  | a                                                                                                                                                                                                    |
| 72                       | b                                                                                                                                                                        | d                                                                                                                                                                              | a                                                                                                         | a                                                                           | a                                                                                                            | d                                                                                              | a                                                  | a                                                                                                                                                                                                    |
| 73                       | a                                                                                                                                                                        | d                                                                                                                                                                              | a                                                                                                         | a                                                                           | a                                                                                                            | d                                                                                              | a                                                  | a                                                                                                                                                                                                    |
| 74                       | b                                                                                                                                                                        | d                                                                                                                                                                              | a                                                                                                         | a                                                                           | a                                                                                                            | d                                                                                              | a                                                  | a                                                                                                                                                                                                    |

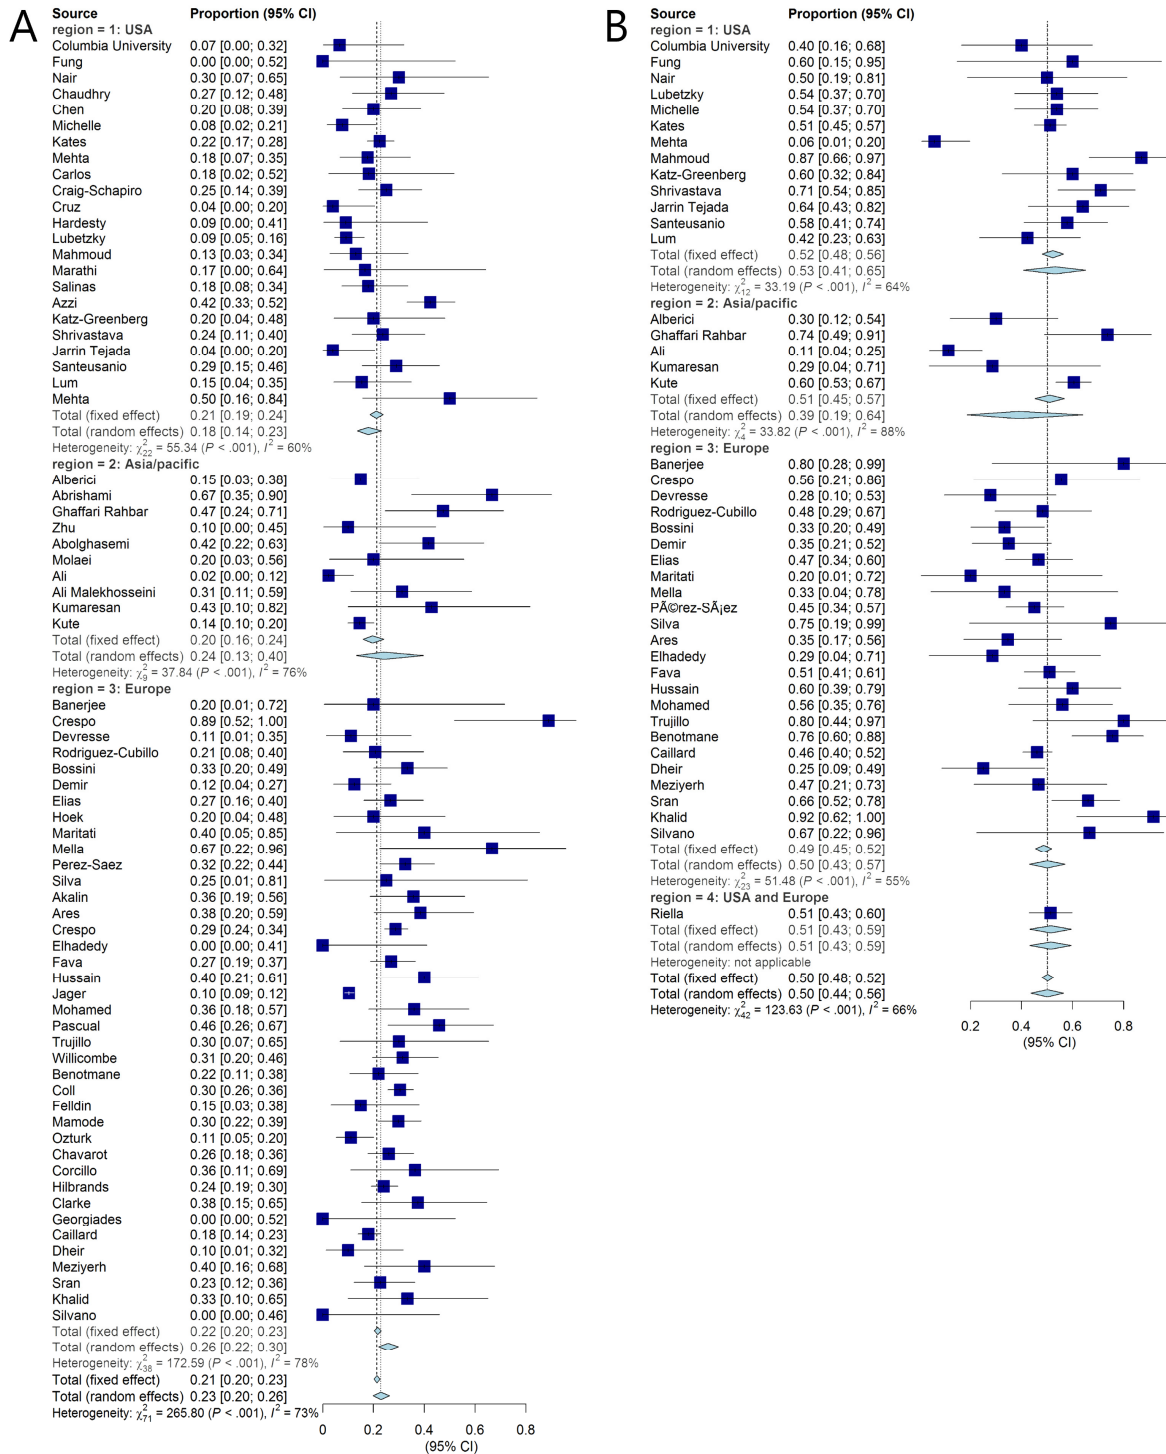

**Supplementary figure 1: Outcome of COVID-19 in KTR per region.** No significant differences between geographical regions were observed in both (A) mortality or (B) AKI after COVID-19.

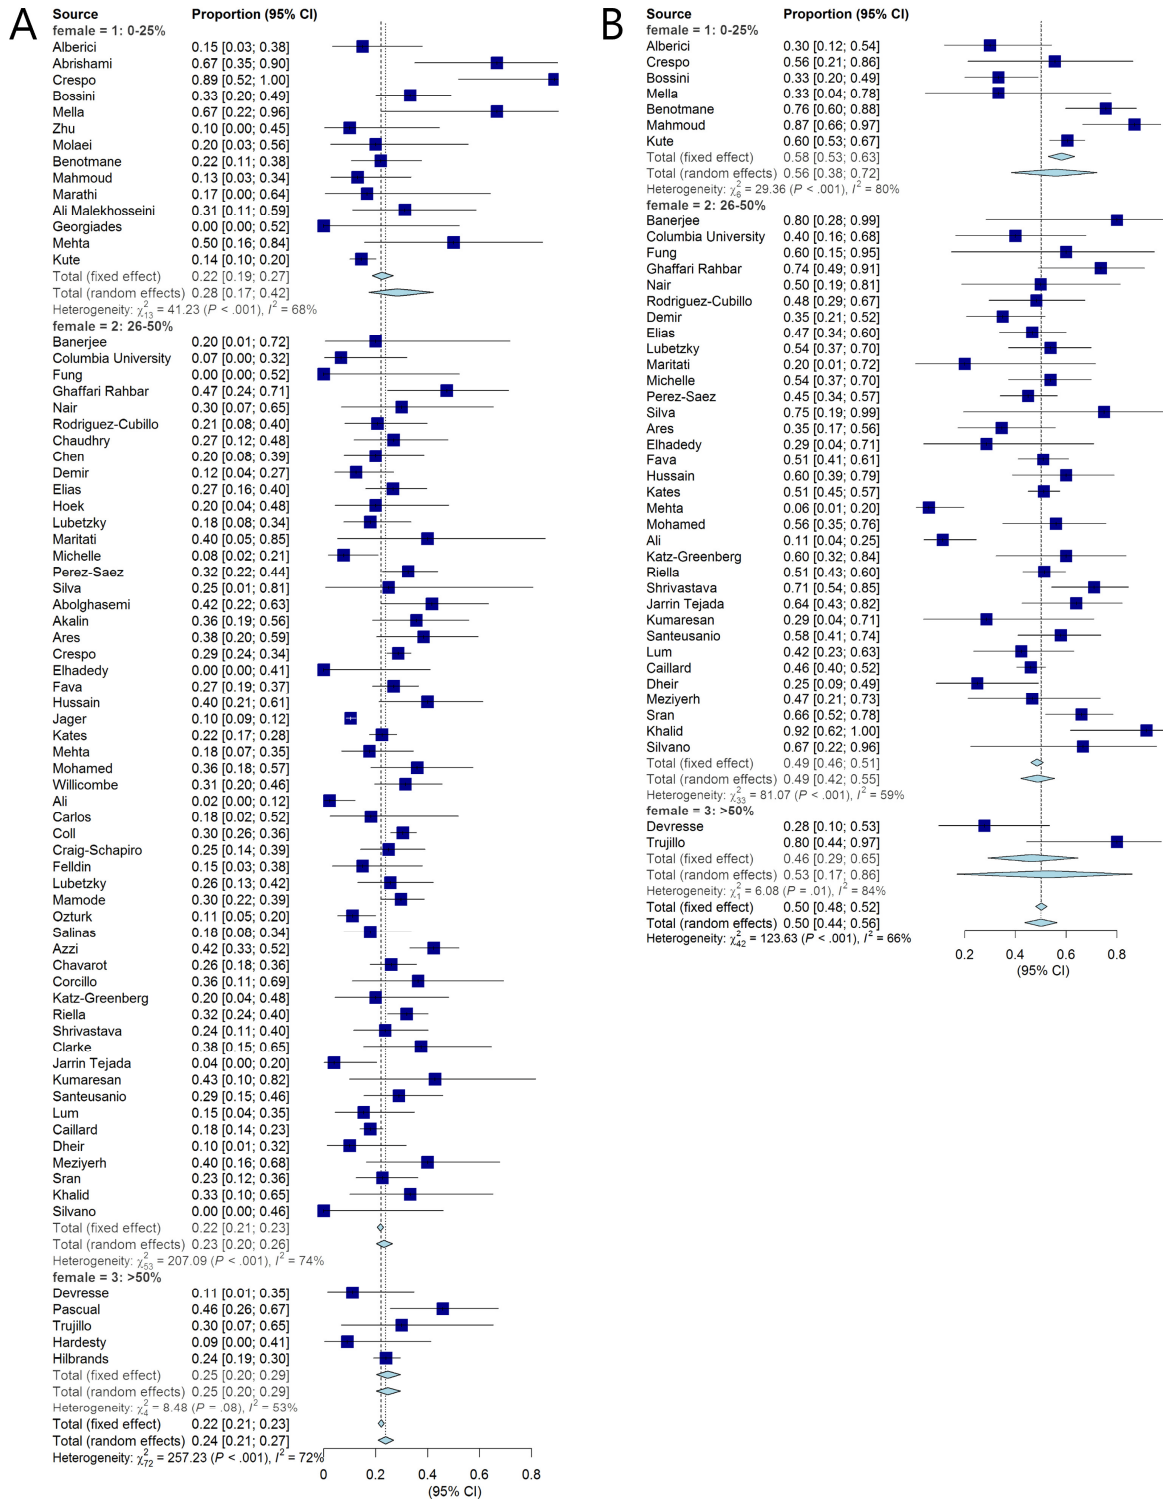

**Supplementary figure 2: Outcome of COVID-19 in KTR in females and males. No significant differences between groups with different proportions of females and males could be identified for both (A) mortality or (B) AKI after COVID-19.**
